# Supplementary material for: Synthesis and Biological Evaluation of Novel Zn(II) and Cd(II) Schiff Base Complexes as Antimicrobial, Antifungal, and Antioxidant Agents
Source: Hindawi journal article supplement (doi:10.1155/2020/8866382), 2020-11-18
Supplement: f1 [file 8866382.f1.doc]

**Supplementary Data**

**Table 1S. bond length (Å) of DMPTHP** using DFT-method.

| **Bond** | **Actual length(Å)** | **Optimum length(Å)** |
| --- | --- | --- |
| C(19)-H(38) | 1.10 | 1.11 |
| C(19)-H(37) | 1.10 | 1.11 |
| C(19)-H(36) | 1.10 | 1.11 |
| N(18)-C(19) | 1.47 | 1.45 |
| C(17)-H(35) | 1.10 | 1.11 |
| C(17)-H(34) | 1.10 | 1.11 |
| C(17)-H(33) | 1.10 | 1.11 |
| N(18)-C(17) | 1.48 | 1.45 |
| C(16)-H(32) | 1.10 | 1.11 |
| C(16)-H(31) | 1.10 | 1.11 |
| C(16)-H(30) | 1.10 | 1.11 |
| C(15)-H(29) | 1.10 | 1.10 |
| C(14)-H(28) | 1.09 | 1.10 |
| C(14)-C(15) | 1.40 | 1.42 |
| C(13)-C(16) | 1.51 | 1.50 |
| C(13)-C(14) | 1.41 | 1.42 |
| C(12)-H(27) | 1.10 | 1.10 |
| C(12)-C(13) | 1.41 | 1.42 |
| C(11)-H(26) | 1.10 | 1.10 |
| C(11)-C(12) | 1.40 | 1.42 |
| C(10)-C(15) | 1.41 | 1.42 |
| C(10)-C(11) | 1.41 | 1.42 |
| N(9)-H(25) | 1.023 | 1.05 |
| N(9)-C(10) | 1.40 | 1.46 |
| C(7)-N(18) | 1.36 | 1.37 |
| C(7)-S(8) | 1.70 | 1.76 |
| N(6)-H(24) | 1.02 | 1.01 |
| N(6)-C(7) | 1.39 | 1.37 |
| C(5)-H(23) | 1.10 | 1.11 |
| C(5)-H(22) | 1.10 | 1.11 |
| C(5)-H(21) | 1.10 | 1.11 |
| N(4)-N(9) | 1.35 | 1.43 |
| C(2)-C(5) | 1.51 | 1.50 |
| C(2)-N(3) | 1.32 | 1.26 |
| C(1)-H(20) | 1.10 | 1.10 |
| C(1)-N(4) | 1.31 | 1.26 |
| C(1)-C(2) | 1.45 | 1.50 |

**Table 2S. Selected bond angles (°) of DMPTHP** using DFT-method.

| **Bonds** | **Actual angles (°)** | **Optimum angles (°)** |
| --- | --- | --- |
| H(38)-C(19)-H(37) | 109.922 | 109 |
| H(38)-C(19)-H(36) | 108.139 | 109 |
| H(38)-C(19)-N(18) | 111.244 |  |
| H(37)-C(19)-H(36) | 110.023 | 109 |
| H(37)-C(19)-N(18) | 108.108 |  |
| H(36)-C(19)-N(18) | 109.404 |  |
| C(19)-N(18)-C(17) | 116.221 | 107.7 |
| C(19)-N(18)-C(7) | 117.642 | 118.4 |
| C(17)-N(18)-C(7) | 124.669 | 118.4 |
| H(35)-C(17)-H(34) | 108.987 | 109 |
| H(35)-C(17)-H(33) | 108.835 | 109 |
| H(35)-C(17)-N(18) | 110.386 |  |
| H(34)-C(17)-H(33) | 109.038 | 109 |
| H(34)-C(17)-N(18) | 111.63 |  |
| H(33)-C(17)-N(18) | 107.911 |  |
| H(32)-C(16)-H(31) | 107.075 | 109 |
| H(32)-C(16)-H(30) | 108.13 | 109 |
| H(32)-C(16)-C(13) | 111.241 | 110 |
| H(31)-C(16)-H(30) | 107.422 | 109 |
| H(31)-C(16)-C(13) | 111.358 | 110 |
| H(30)-C(16)-C(13) | 111.409 | 110 |
| H(29)-C(15)-C(14) | 120.513 | 120 |
| H(29)-C(15)-C(10) | 119.82 | 120 |
| C(14)-C(15)-C(10) | 119.666 |  |
| H(28)-C(14)-C(15) | 118.556 | 120 |
| H(28)-C(14)-C(13) | 119.346 | 120 |
| C(15)-C(14)-C(13) | 122.097 |  |
| C(16)-C(13)-C(14) | 121.244 | 121.4 |
| C(16)-C(13)-C(12) | 121.421 | 121.4 |
| C(14)-C(13)-C(12) | 117.326 | 120 |
| H(27)-C(12)-C(13) | 119.735 | 120 |
| H(27)-C(12)-C(11) | 118.668 | 120 |
| C(13)-C(12)-C(11) | 121.594 |  |
| H(26)-C(11)-C(12) | 120.053 | 120 |
| H(26)-C(11)-C(10) | 119.681 | 120 |
| C(12)-C(11)-C(10) | 120.262 |  |
| C(15)-C(10)-C(11) | 119.053 | 120 |
| C(15)-C(10)-N(9) | 122.674 | 120 |
| C(11)-C(10)-N(9) | 118.273 | 120 |
| H(25)-N(9)-C(10) | 117.723 | 118 |
| H(25)-N(9)-N(4) | 119.353 | 113 |
| C(10)-N(9)-N(4) | 122.899 | 124 |
| N(18)-C(7)-S(8) | 123.498 | 124.3 |
| N(18)-C(7)-N(6) | 118.854 | 120 |
| S(8)-C(7)-N(6) | 117.637 | 124.3 |
| H(24)-N(6)-C(7) | 112.243 | 117.4 |
| H(24)-N(6)-N(3) | 120.406 |  |
| C(7)-N(6)-N(3) | 123.417 |  |
| H(23)-C(5)-H(22) | 107.335 | 109 |
| H(23)-C(5)-H(21) | 109.106 | 109 |
| H(23)-C(5)-C(2) | 110.396 | 110 |
| H(22)-C(5)-H(21) | 108.128 | 109 |
| H(22)-C(5)-C(2) | 110.918 | 110 |
| H(21)-C(5)-C(2) | 110.854 | 110 |
| N(9)-N(4)-C(1) | 116.912 | 115 |
| N(6)-N(3)-C(2) | 116.676 |  |
| C(5)-C(2)-N(3) | 124.367 | 115.1 |
| C(5)-C(2)-C(1) | 121.659 | 121.4 |
| N(3)-C(2)-C(1) | 113.964 | 120 |
| H(20)-C(1)-N(4) | 121.561 | 116.5 |
| H(20)-C(1)-C(2) | 116.332 | 120 |
| N(4)-C(1)-C(2) | 122.077 | 123.5 |

**Table 3S. Selected bond length (Å) of [Zn(DMPTHP)Cl]** using DFT-method.

| **Bond** | **Actual length(Å)** | **Optimum length(Å)** |
| --- | --- | --- |
| C(21)-H(39) | 1.101 | 1.113 |
| C(21)-H(38) | 1.102 | 1.113 |
| C(21)-H(37) | 1.094 | 1.113 |
| N(20)-C(21) | 1.472 | 1.47 |
| Zn(18)-Cl(19) | 2.255 |  |
| C(17)-H(36) | 1.092 | 1.113 |
| C(17)-H(35) | 1.102 | 1.113 |
| C(17)-H(34) | 1.099 | 1.113 |
| N(20)-C(17) | 1.475 | 1.47 |
| C(16)-H(33) | 1.104 | 1.113 |
| C(16)-H(32) | 1.102 | 1.113 |
| C(16)-H(31) | 1.1 | 1.113 |
| C(15)-H(30) | 1.087 | 1.100 |
| C(14)-H(29) | 1.092 | 1.100 |
| C(14)-C(15) | 1.401 | 1.42 |
| C(13)-C(16) | 1.513 | 1.497 |
| C(13)-C(14) | 1.408 | 1.42 |
| C(12)-H(28) | 1.091 | 1.100 |
| C(12)-C(13) | 1.411 | 1.42 |
| C(11)-H(27) | 1.092 | 1.100 |
| C(11)-C(12) | 1.398 | 1.420 |
| C(10)-C(15) | 1.407 | 1.420 |
| C(10)-C(11) | 1.41 | 1.420 |
| N(9)-H(26) | 1.022 | 1.050 |
| N(9)-C(10) | 1.411 | 1.462 |
| S(8)-Zn(18) | 2.379 |  |
| C(7)-N(20) | 1.37 | 1.462 |
| C(7)-S(8) | 1.765 | 1.856 |
| N(6)-C(7) | 1.369 | 1.26 |
| C(5)-H(25) | 1.098 | 1.113 |
| C(5)-H(24) | 1.101 | 1.113 |
| C(5)-H(23) | 1.099 | 1.113 |
| N(4)-Zn(18) | 2.23 |  |
| N(4)-N(9) | 1.37 | 1.426 |
| N(3)-Zn(18) | 2.075 |  |
| N(3)-N(6) | 1.346 | 1.418 |
| C(2)-C(5) | 1.505 | 1.497 |
| C(2)-N(3) | 1.322 | 1.26 |
| C(1)-H(22) | 1.097 | 1.1 |
| C(1)-N(4) | 1.322 | 1.26 |
| C(1)-C(2) | 1.453 | 1.503 |

**Table 4S. Selected bond angles of [Zn(DMPTHP)Cl] u**sing DFT-method.

| **Bond** | **Actual angles (°)** | **Optimum** **angles (°)** |
| --- | --- | --- |
| H(39)-C(21)-H(38) | 108.754 | 109 |
| H(39)-C(21)-H(37) | 109.131 | 109 |
| H(39)-C(21)-N(20) | 108.431 |  |
| H(38)-C(21)-H(37) | 109.093 | 109 |
| H(38)-C(21)-N(20) | 111.267 |  |
| H(37)-C(21)-N(20) | 110.124 |  |
| C(21)-N(20)-C(17) | 115.487 |  |
| C(21)-N(20)-C(7) | 122.817 | 108 |
| C(17)-N(20)-C(7) | 121.018 | 108 |
| Cl(19)-Zn(18)-S(8) | 108.997 |  |
| Cl(19)-Zn(18)-N(4) | 110.835 |  |
| Cl(19)-Zn(18)-N(3) | 127.317 |  |
| S(8)-Zn(18)-N(4) | 140.04 |  |
| S(8)-Zn(18)-N(3) | 81.299 |  |
| N(4)-Zn(18)-N(3) | 77.37 |  |
| H(36)-C(17)-H(35) | 109.263 | 109 |
| H(36)-C(17)-H(34) | 109.948 | 109 |
| H(36)-C(17)-N(20) | 109.386 |  |
| H(35)-C(17)-H(34) | 109.026 | 109 |
| H(35)-C(17)-N(20) | 110.799 |  |
| H(34)-C(17)-N(20) | 108.406 |  |
| H(33)-C(16)-H(32) | 106.893 | 109 |
| H(33)-C(16)-H(31) | 107.335 | 109 |
| H(33)-C(16)-C(13) | 111.195 | 110 |
| H(32)-C(16)-H(31) | 107.836 | 109 |
| H(32)-C(16)-C(13) | 111.734 | 110 |
| H(31)-C(16)-C(13) | 111.604 | 110 |
| H(30)-C(15)-C(14) | 119.961 | 120 |
| H(30)-C(15)-C(10) | 120.231 | 120 |
| C(14)-C(15)-C(10) | 119.72 |  |
| H(29)-C(14)-C(15) | 118.44 | 120 |
| H(29)-C(14)-C(13) | 119.336 | 120 |
| C(15)-C(14)-C(13) | 122.175 |  |
| C(16)-C(13)-C(14) | 121.467 | 121.4 |
| C(16)-C(13)-C(12) | 121.428 | 121.4 |
| C(14)-C(13)-C(12) | 117.098 | 120 |
| H(28)-C(12)-C(13) | 119.466 | 120 |
| H(28)-C(12)-C(11) | 118.779 | 120 |
| C(13)-C(12)-C(11) | 121.752 |  |
| H(27)-C(11)-C(12) | 120.264 | 120 |
| H(27)-C(11)-C(10) | 119.629 | 120 |
| C(12)-C(11)-C(10) | 120.082 |  |
| C(15)-C(10)-C(11) | 119.169 | 120 |
| C(15)-C(10)-N(9) | 123.203 | 120 |
| C(11)-C(10)-N(9) | 117.607 | 120 |
| H(26)-N(9)-C(10) | 115.917 | 118 |
| H(26)-N(9)-N(4) | 114.862 | 113 |
| C(10)-N(9)-N(4) | 123.445 | 124 |
| Zn(18)-S(8)-C(7) | 91.66 |  |
| N(20)-C(7)-S(8) | 118.814 |  |
| N(20)-C(7)-N(6) | 115.392 | 126 |
| S(8)-C(7)-N(6) | 125.759 | 126 |
| C(7)-N(6)-N(3) | 112.008 | 107.5 |
| H(25)-C(5)-H(24) | 108.18 | 109 |
| H(25)-C(5)-H(23) | 109.192 | 109 |
| H(25)-C(5)-C(2) | 111.337 | 110 |
| H(24)-C(5)-H(23) | 107.286 | 109 |
| H(24)-C(5)-C(2) | 110.299 | 110 |
| H(23)-C(5)-C(2) | 110.431 | 110 |
| Zn(18)-N(4)-N(9) | 133.102 |  |
| Zn(18)-N(4)-C(1) | 108.183 |  |
| N(9)-N(4)-C(1) | 116.783 |  |
| Zn(18)-N(3)-N(6) | 119.258 |  |
| Zn(18)-N(3)-C(2) | 117.02 |  |
| N(6)-N(3)-C(2) | 123.1 |  |
| C(5)-C(2)-N(3) | 125.522 | 115.1 |
| C(5)-C(2)-C(1) | 120.414 | 121.4 |
| N(3)-C(2)-C(1) | 114.006 | 120 |
| H(22)-C(1)-N(4) | 119.459 | 116.5 |
| H(22)-C(1)-C(2) | 118.558 | 120 |
| N(4)-C(1)-C(2) | 121.858 | 123.5 |
